# Supplementary material for: Advantages and Limitations of Clinical Scores for Donation After Circulatory Death Liver Transplantation
Source: PubMed Central journal article supplement (PMC8766343; doi:10.3389/fsurg.2021.808733), 2022-01-05
Supplement: Table_1.pdf [file Table_1.pdf]

**Supplementary Table 1:** Additional donation after cardiac death donor times.

| <b>Donor times</b>                          | <b>DCD LT (UCSF)<br/>(n = 136)</b> |
|---------------------------------------------|------------------------------------|
| Extubation to arterial flush, minutes (IRQ) | 24.3 ± 6.8 (20 - 28)               |
| Incision to arterial flush, minutes (IRQ)   | 3.3 ± 2.3 (2 - 5)                  |

Data are presented as mean ± standard deviation.

IRQ, interquartile range; NA, not available; UNOS, United Network for Organ Sharing

**Supplementary Table 2:** Multivariate analysis of predictive factors of 1-year graft failure after donation after cardiac death liver transplantation in the UCSF cohort; variable selection and points attribution to design the total warm ischemia time index. Logistic regression.

| Variables                              |        | Multivariate analysis |            |         | TotWIT index points |
|----------------------------------------|--------|-----------------------|------------|---------|---------------------|
|                                        |        | OR                    | 95% CI     | P-value |                     |
| <b>UCSF cohort</b>                     |        |                       |            |         |                     |
| <b>Donor WIT, minutes</b>              | ≤20    | Ref.                  |            |         |                     |
|                                        | >20-30 | 1.8                   | 0.6 - 5.8  | 0.301   | 2                   |
|                                        | >30    | 5.9                   | 0.5 - 73.7 | 0.170   | 4                   |
| <b>Donor hepatectomy time, minutes</b> | <40    | Ref.                  |            |         |                     |
|                                        | 40-60  | 1.9                   | 0.5 - 6.7  | 0.312   | 1                   |
|                                        | >60    | 4.7                   | 0.9 - 23.5 | 0.061   | 3                   |
| <b>TIPS</b>                            | <40    | Ref.                  |            |         |                     |
|                                        | ≥40    | 1.0                   | 0.1 - 9.7  | 0.977   | NA                  |

BMI, body mass index; CI, confidence interval; OR, odds ratio; DCD, donation after cardiac death; MELD, model for end-stage liver disease; HBV, hepatitis B virus; HCV, hepatitis C virus; Ref., reference; WIT, warm ischemia time, TIPS, transjugular intrahepatic portosystemic shunt; UNOS, United Network for Organ Sharing.

**Supplementary Table 3:** Multivariate analysis of predictive factors of 1-year graft failure after donation after cardiac death liver transplantation in the UNOS cohort; variable selection and points attribution to design the UC-DCD score. Logistic regression.

| Variables                              |           | Multivariate analysis |            |         | UC-DCD score points |
|----------------------------------------|-----------|-----------------------|------------|---------|---------------------|
|                                        |           | OR                    | 95% CI     | P-value |                     |
| <b>UNOS cohort</b>                     |           |                       |            |         |                     |
| <b>Donor age, years</b>                | <30       | Ref.                  |            |         |                     |
|                                        | 30-60     | 1.4                   | 1.2 - 1.7  | <0.001  | 6                   |
|                                        | ≥60       | 2.0                   | 1.2 - 3.5  | 0.014   | 9                   |
| <b>Donor WIT, minutes</b>              | <25       | Ref.                  |            |         |                     |
|                                        | ≥25       | 1.2                   | 0.9 - 1.4  | 0.193   | 5                   |
| <b>Cold ischemia time, minutes</b>     | <7        | Ref.                  |            |         |                     |
|                                        | 7-10      | 1.8                   | 1.5 - 2.3  | <0.001  | 7                   |
|                                        | ≥10       | 1.9                   | 1.2 - 3.1  | 0.004   | 9                   |
| <b>Donor hepatectomy time, minutes</b> | <70       | Ref.                  |            |         |                     |
|                                        | ≥70       | 1.4                   | 0.9 - 2.2  | 0.127   | 6                   |
| <b>Recipient age, years</b>            | <60       | Ref.                  |            |         |                     |
|                                        | ≥60       | 1.4                   | 1.2 - 1.7  | <0.001  | 6                   |
| <b>Recipient BMI, kg/m<sup>2</sup></b> | <40       | Ref.                  |            |         |                     |
|                                        | ≥40       | 1.5                   | 1.0 - 2.3  | 0.036   | 6                   |
| <b>Lab MELD</b>                        | <24       | Ref.                  |            |         |                     |
|                                        | 24-35     | 1.6                   | 1.3 - 1.9  | <0.001  | 7                   |
|                                        | ≥35       | 2.3                   | 1.7 - 3.1  | <0.001  | 10                  |
| <b>Recipient underlying disease</b>    | Low risk  | Ref.                  |            |         |                     |
|                                        | High risk | 1.6                   | 1.2 - 2.2  | 0.002   | 7                   |
|                                        | HCV-HBV   | 6.7                   | 1.3 - 34.9 | 0.024   | 29                  |
| <b>TIPS</b>                            | No        | Ref.                  |            |         |                     |
|                                        | Yes       | 1.5                   | 1.2 - 2.0  | 0.002   | 7                   |
| <b>Life support</b>                    | No        | Ref.                  |            |         |                     |
|                                        | Yes       | 2.6                   | 1.6 - 4.2  | <0.001  | 11                  |

BMI, body mass index; CI, confidence interval; OR, odds ratio; DCD, donation after cardiac death; MELD, model for end-stage liver disease; HBV, hepatitis B virus; HCV, hepatitis C virus; Ref., reference; WIT, warm ischemia time, TIPS, transjugular intrahepatic portosystemic shunt; UNOS, United Network for Organ Sharing. Low risk recipient underlying disease: Alpha-1 antitrypsin deficiency, autoimmune hepatitis, Budd-Chiari syndrome, cystic fibrosis, cryptogenic, alcoholic cirrhosis, hepatitis B, hepatocellular carcinoma, hepatitis C, nonalcoholic steato-hepatitis, primary biliary cholangitis, polycystic kidney and liver disease, primary sclerosing cholangitis, Wilson disease; High risk recipient underlying disease: acute liver failure, biliary atresia, hemochromatosis, tumor other than hepatocellular carcinoma, other biliary cirrhosis, other causes; HCV-HBV: combination of hepatitis C and hepatitis B.

**Supplementary Table 4:** Biliary complications after donation after cardiac death liver transplantation.

| Types                                    | DCD LT<br>(n = 136) |
|------------------------------------------|---------------------|
| <b>Anastomotic biliary stricture</b>     | 39 (28.7)           |
| Time to stricture, day(s) (IRQ)          | 86 (32 - 159)       |
| <b>Non-anastomotic biliary stricture</b> | 21 (15.4)           |
| Time to stricture, day(s) (IRQ)          | 59 (37 - 123)       |
| <b>Bile leak (%)</b>                     | 14 (10.3)           |
| Time to bile leak, day(s) (IRQ)          | 27 (4 - 84)         |

Data are presented as median (IRQ) or n (%).

DCD, donation after cardiac death; LT, liver transplantation; IRQ, interquartile range

**Supplementary Table 5:** Risk factors for non-anastomotic strictures in donation after cardiac death liver transplantation.

| Variables                                           |         | Univariate analysis |            |         |
|-----------------------------------------------------|---------|---------------------|------------|---------|
|                                                     |         | HR                  | 95% CI     | P-value |
| <b>UK-DCD parameters</b>                            |         |                     |            |         |
| <b>Donor age</b>                                    |         | NA                  |            |         |
| <b>Donor BMI, kg/m<sup>2</sup></b>                  | ≤25     | Ref.                |            |         |
|                                                     | >25     | 1.1                 | 0.5 - 2.6  | 0.828   |
| <b>Functional donor warm ischemia time, minutes</b> | ≤20     | Ref.                |            |         |
|                                                     | >20-30  | 1.6                 | 0.6 - 3.8  | 0.324   |
|                                                     | >30     | 1.7                 | 0.2 - 13.4 | 0.614   |
| <b>Cold ischemia time, hours</b>                    | ≤6      | Ref.                |            |         |
|                                                     | >6      | 1.2                 | 0.4 - 3.7  | 0.706   |
| <b>Recipient age, years</b>                         | ≤60     | Ref.                |            |         |
|                                                     | >60     | 0.7                 | 0.3 - 1.7  | 0.430   |
| <b>Lab MELD</b>                                     | ≤25     | Ref.                |            |         |
|                                                     | >25     | 0.5                 | 0.2 - 1.4  | 0.186   |
| <b>Retransplantation</b>                            |         | NA                  |            |         |
| <b>UCLA-DCD and KCH-DCD parameters</b>              |         |                     |            |         |
| <b>Donor HBV</b>                                    | No      | Ref.                |            |         |
|                                                     | Yes     | 3.2                 | 0.4 - 23.7 | 0.259   |
| <b>Donor hepatectomy time, minutes</b>              | <40     | Ref.                |            |         |
|                                                     | 40-60   | 0.9                 | 0.3 - 2.6  | 0.910   |
|                                                     | >60     | 2.3                 | 0.7 - 7.4  | 0.145   |
| <b>Recipient BMI</b>                                | ≤30     | Ref.                |            |         |
|                                                     | >30     | 0.9                 | 0.3 - 2.4  | 0.785   |
| <b>Recipient underlying disease</b>                 | Other   | Ref.                |            |         |
|                                                     | HCV/ma. | 0.5                 | 0.2 - 1.3  | 0.157   |
|                                                     | HCV+ma. | 0.5                 | 0.1 - 1.6  | 0.235   |

BMI, body mass index; CI, confidence interval; HR, hazard ratio; NA, not applicable; DCD, donation after cardiac death; MELD, model for end-stage liver disease; HBV, hepatitis B virus; HCV, hepatitis C virus; Ref., reference; UK, United Kingdom; UCLA, University of California Los Angeles; KCH, King's College Hospital; ma., malignancy.
